# Supplementary material for: Preparation, Properties and Water Dissolution Behavior of Polyethylene Oxide Mats Prepared by Solution Blow Spinning
Source: MDPI journal article supplement (doi:10.3390/polym14071299), 2022-03-23
Supplement: s1 [file s1]

## Supplementary Material

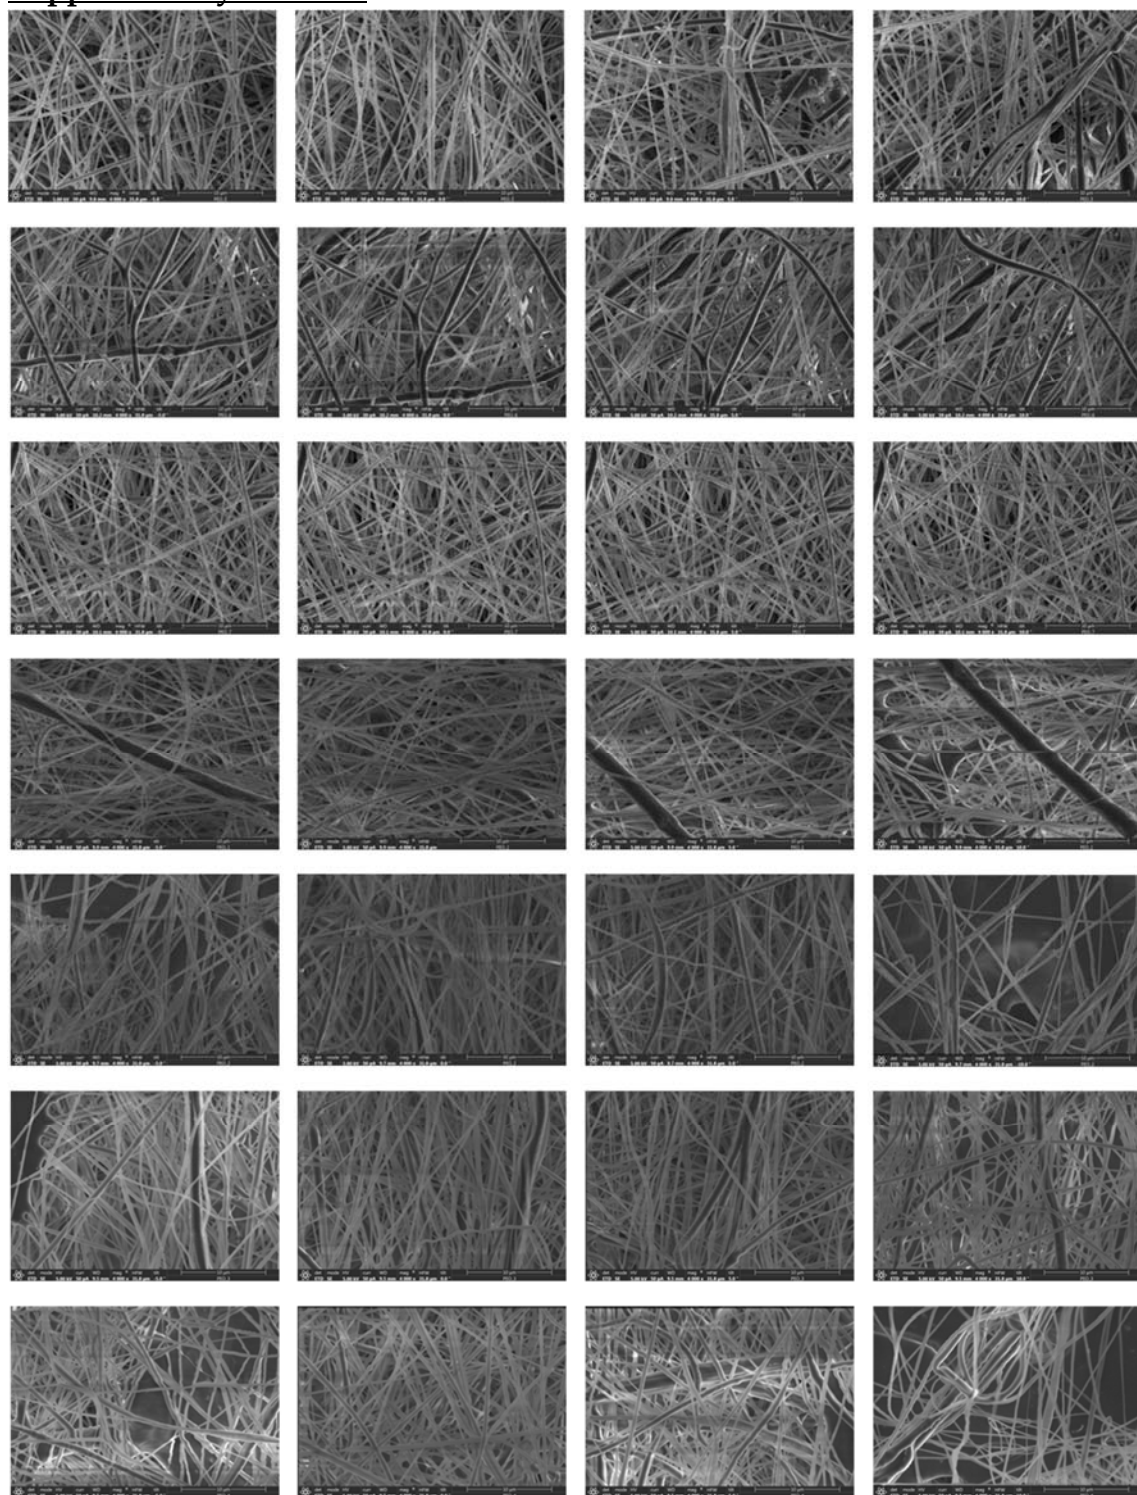

**Figure S1.** SEM images of the different PEO developed materials with a 4000x magnification at different tilts. Columns (from left to right) represent the different tilt angles: -5, 0, 5 and 10 degrees; whereas rows (from top to bottom) represent the different materials: PEO-46, PEO-55, PEO-64, PEO-73, PEO-82, PEO-91 AND PEO-100.

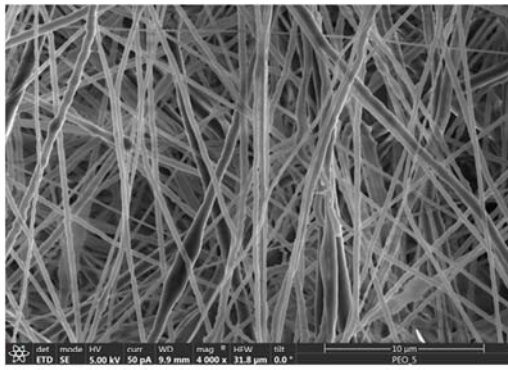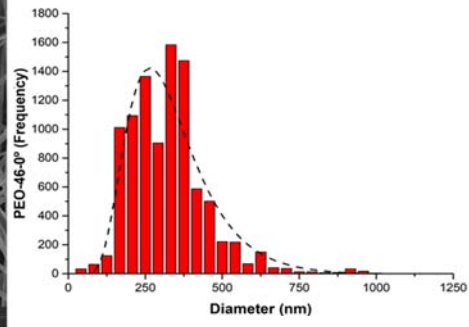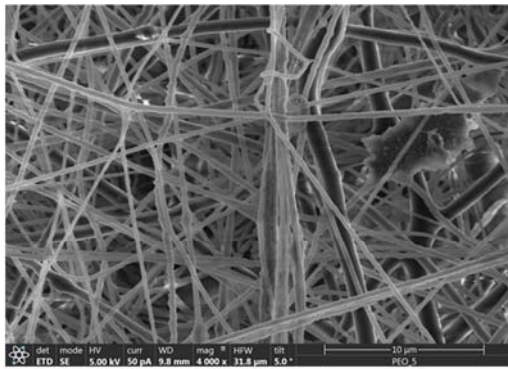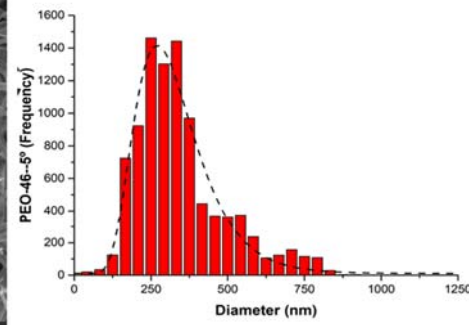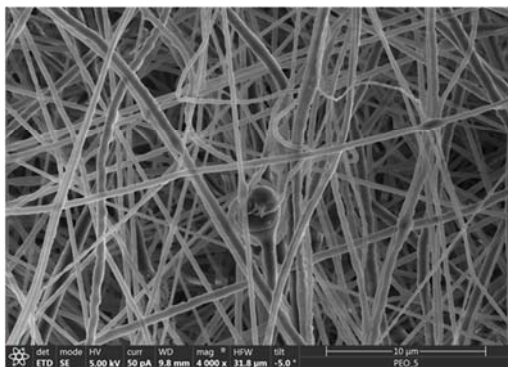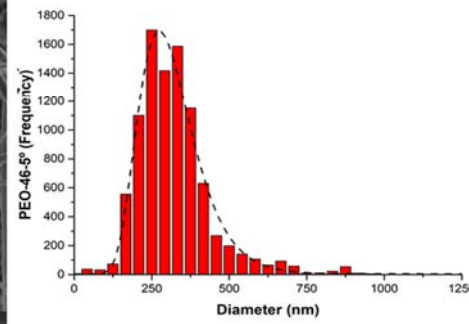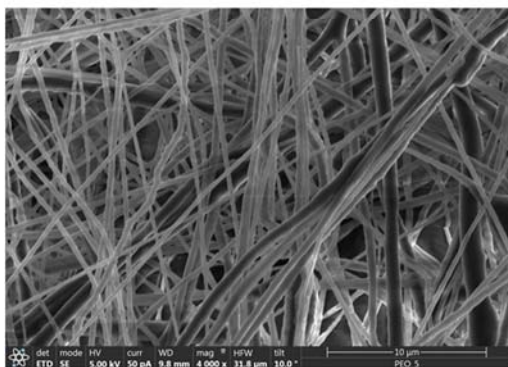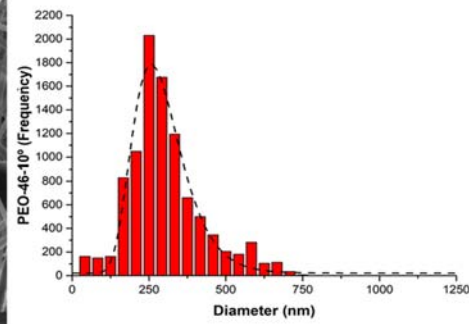

Figure S2. Fiber size distributions of PEO-46 as a function of the tilt.

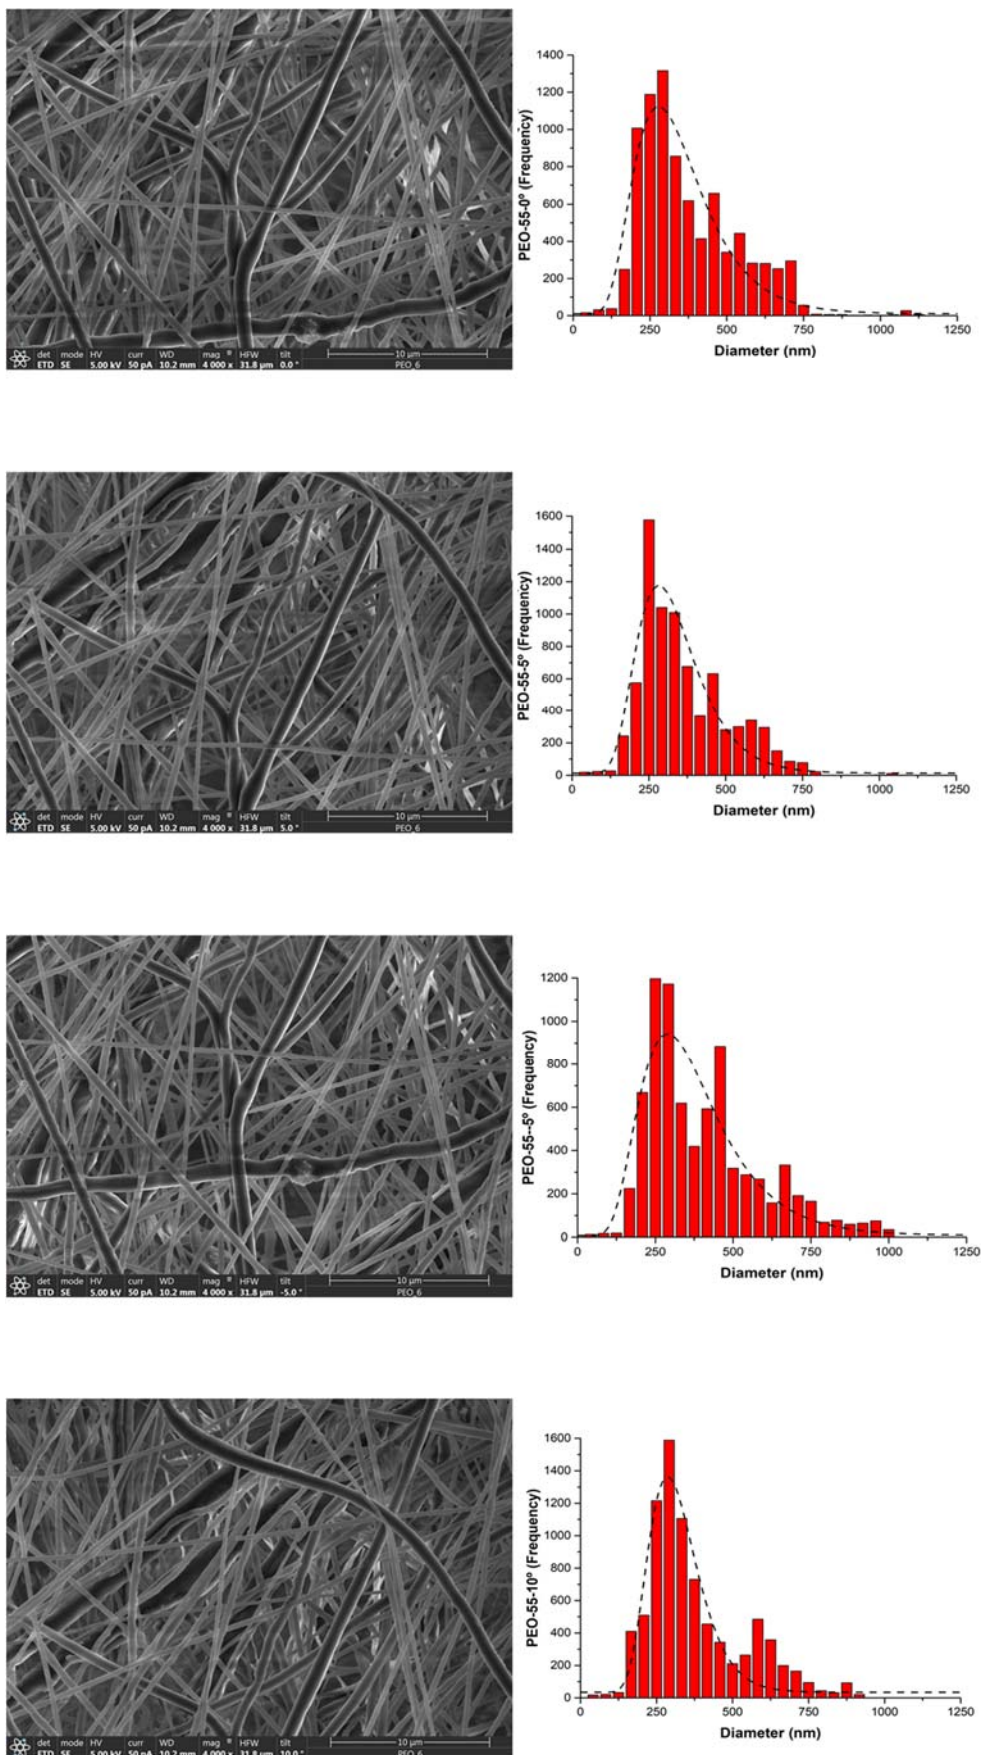

*Figure S3. Fiber size distributions of PEO-55 as a function of the tilt.*



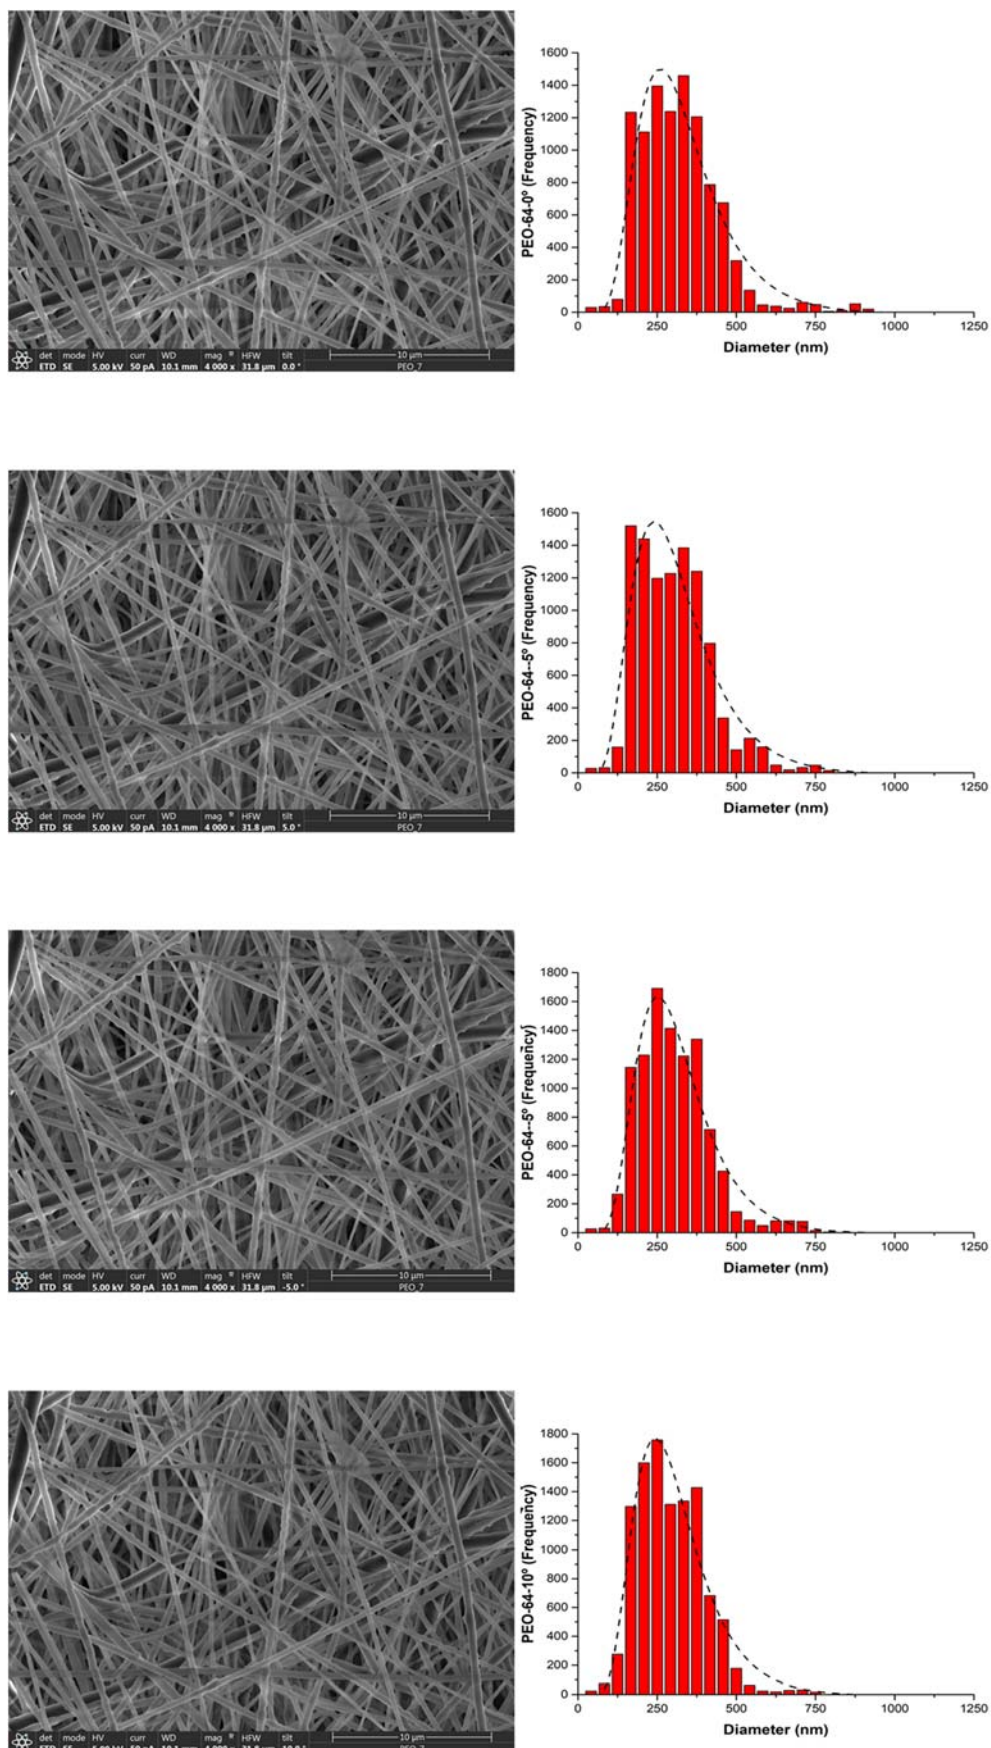

*Figure S4. Fiber size distributions of PEO-64 as a function of the tilt.*

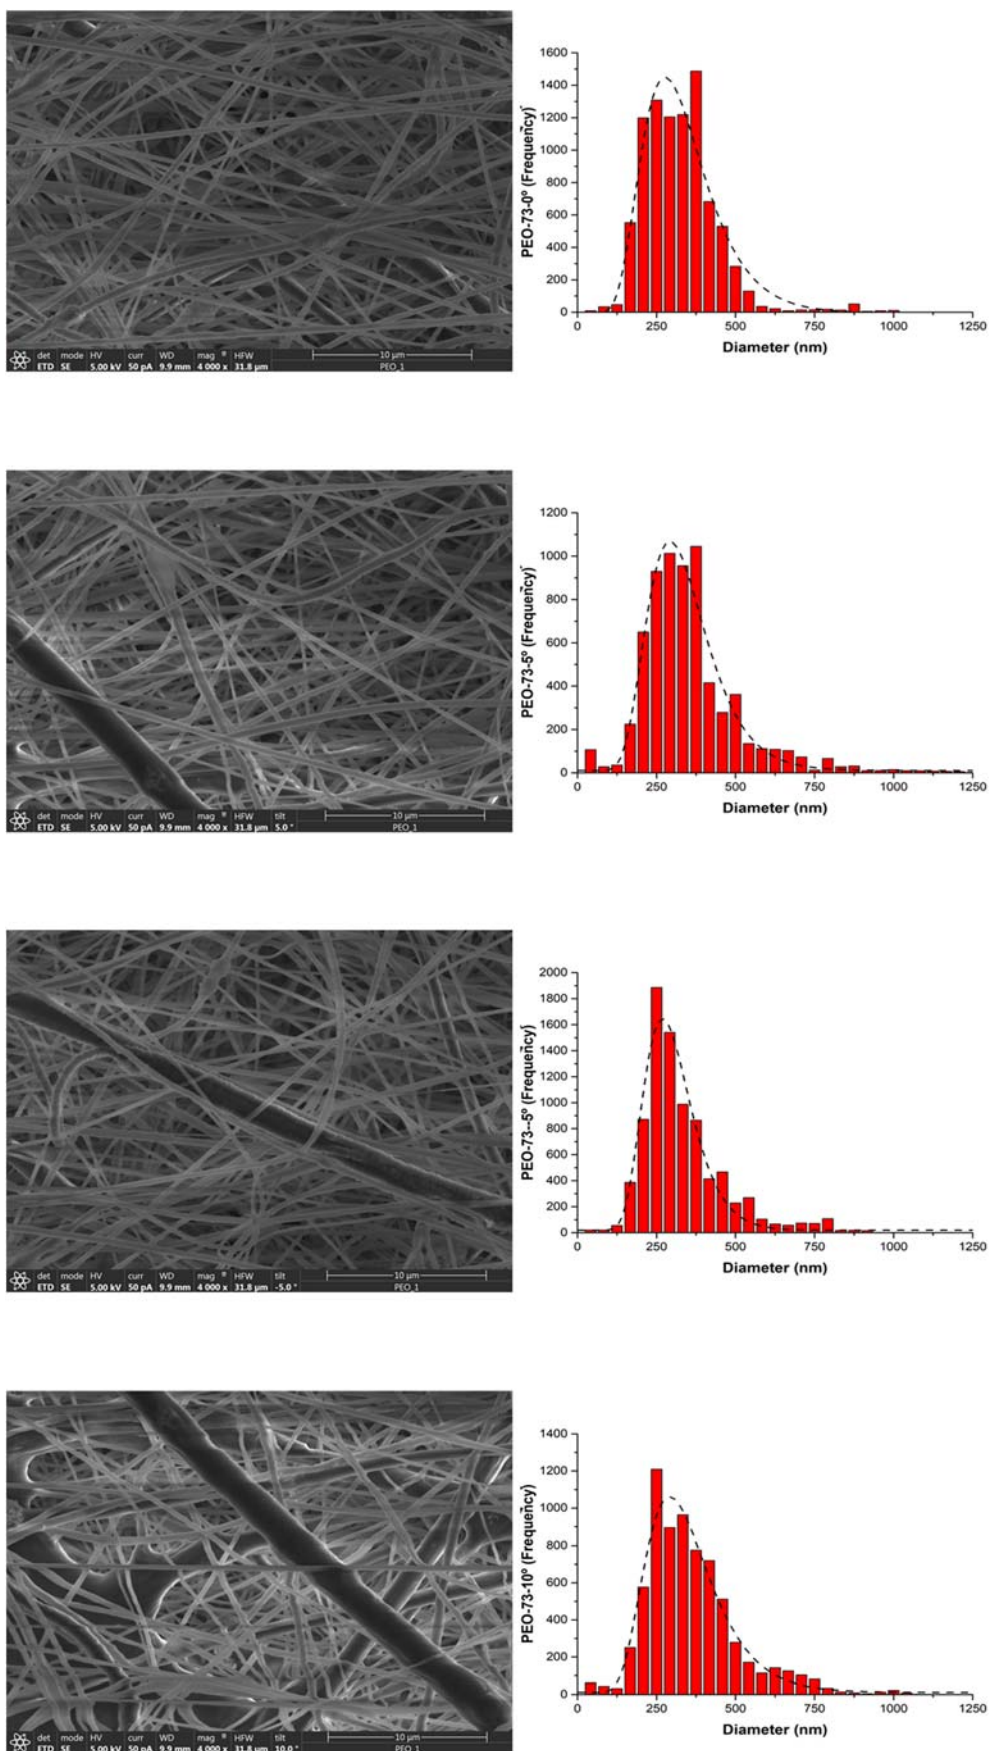

*Figure S5. Fiber size distributions of PEO-73 as a function of the tilt.*

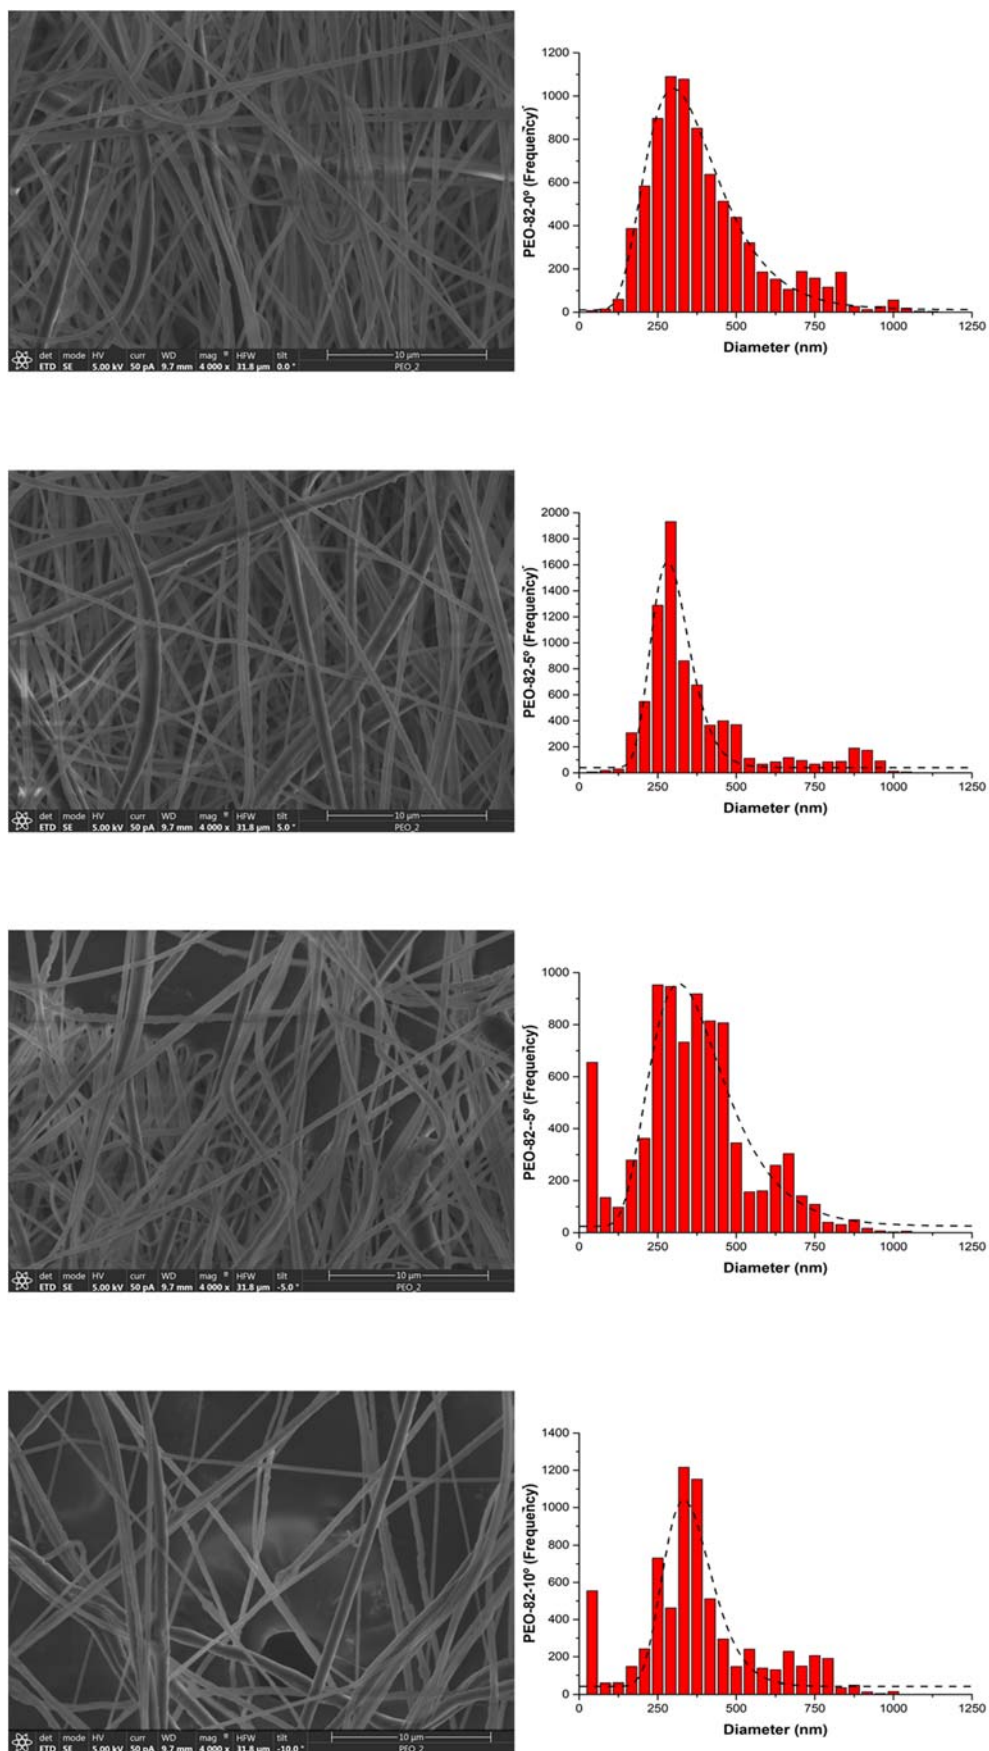

*Figure S6. Fiber size distributions of PEO-82 as a function of the tilt.*



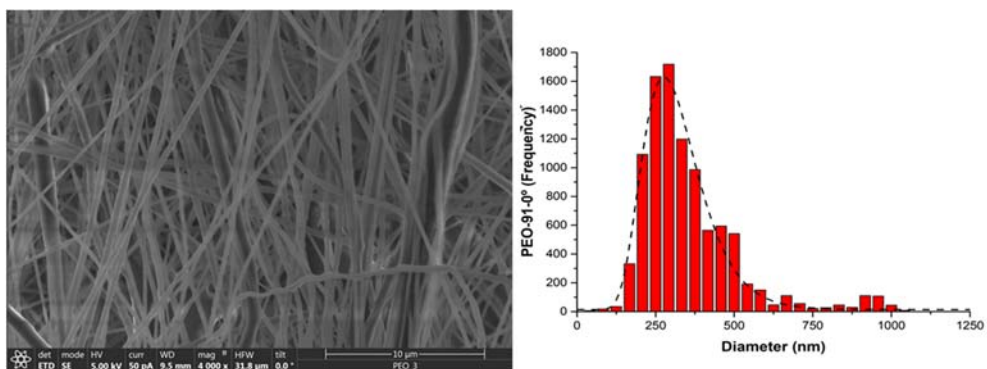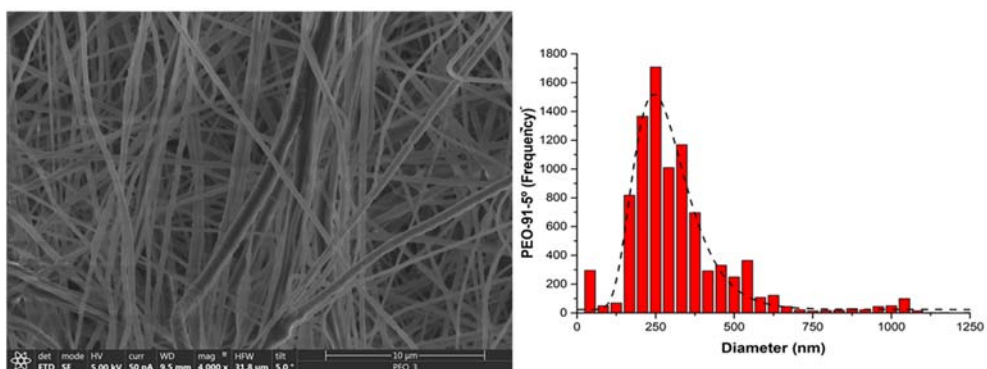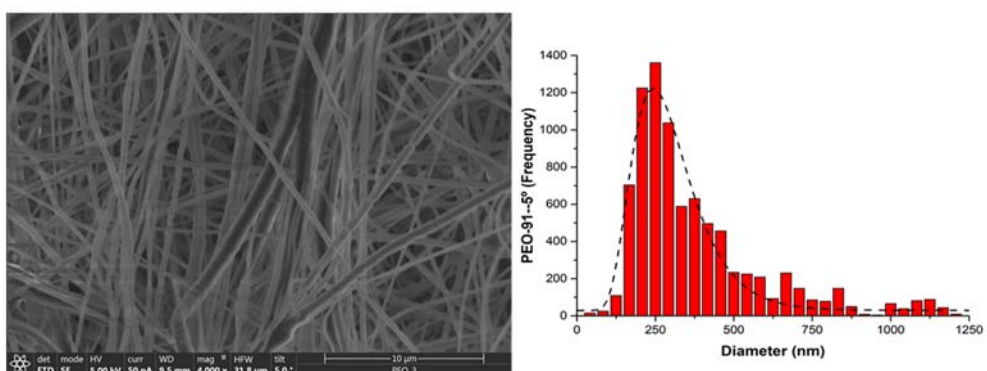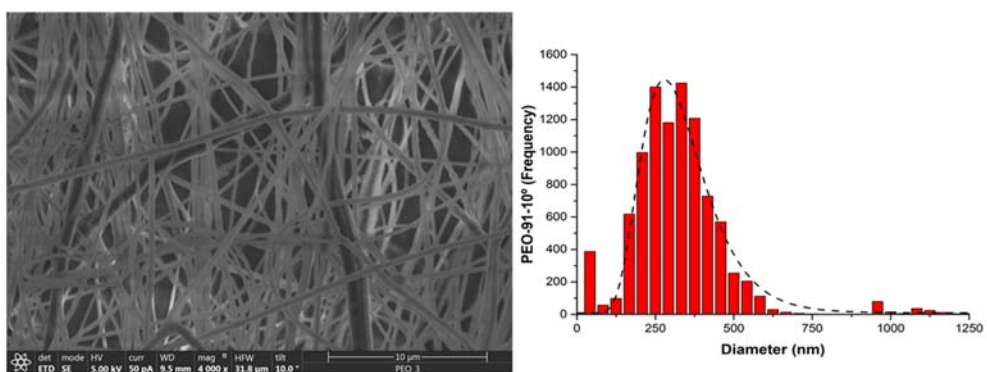

Figure S7. Fiber size distributions of PEO-91 as a function of the tilt.

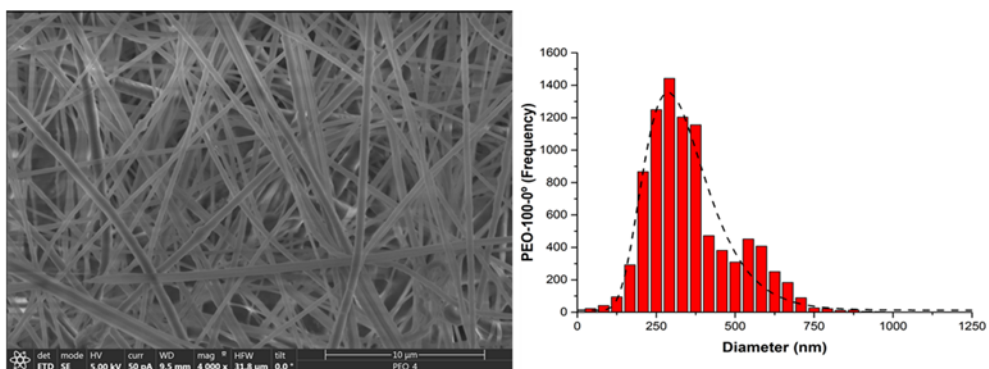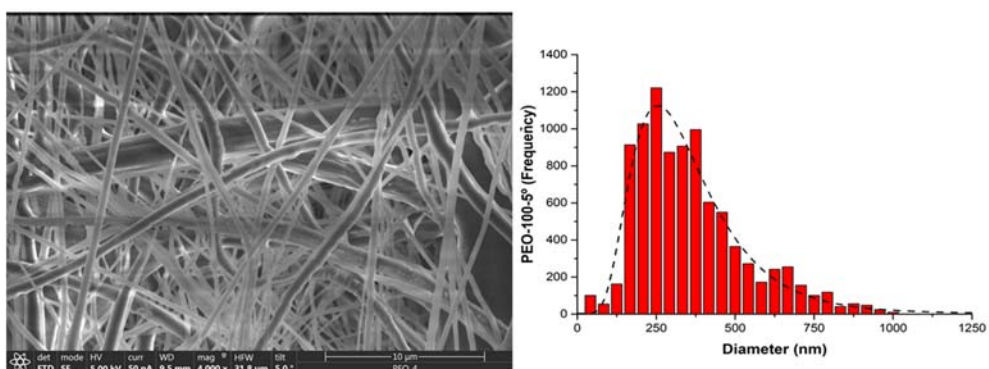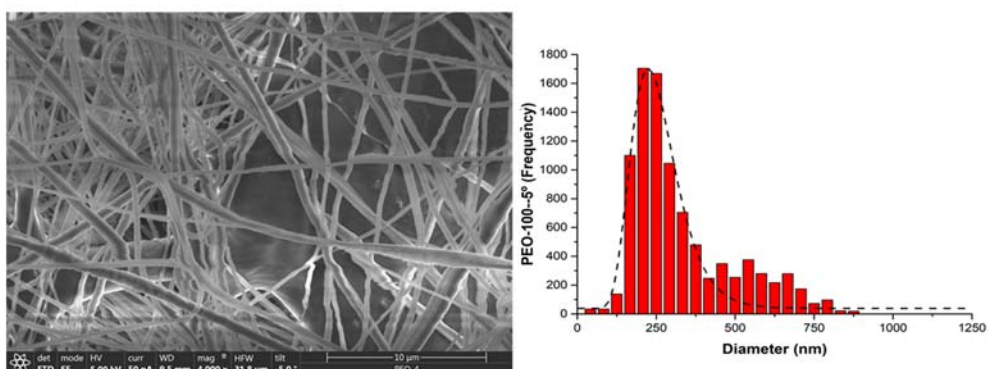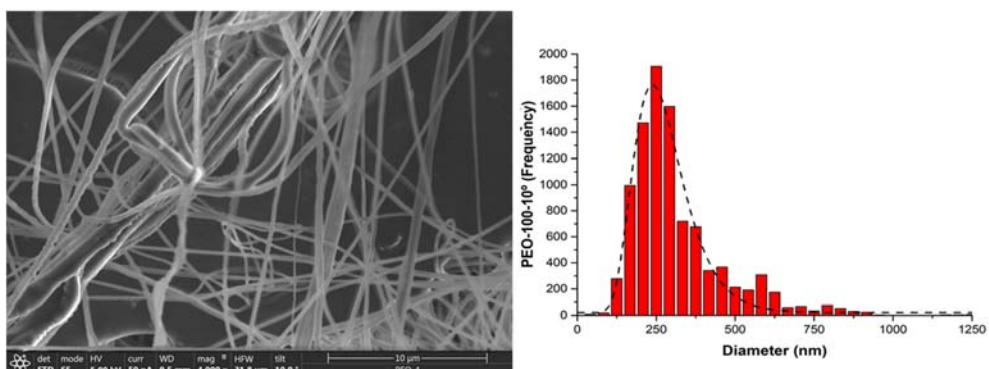

Figure S8. Fiber size distributions of PEO-100 as a function of the tilt.



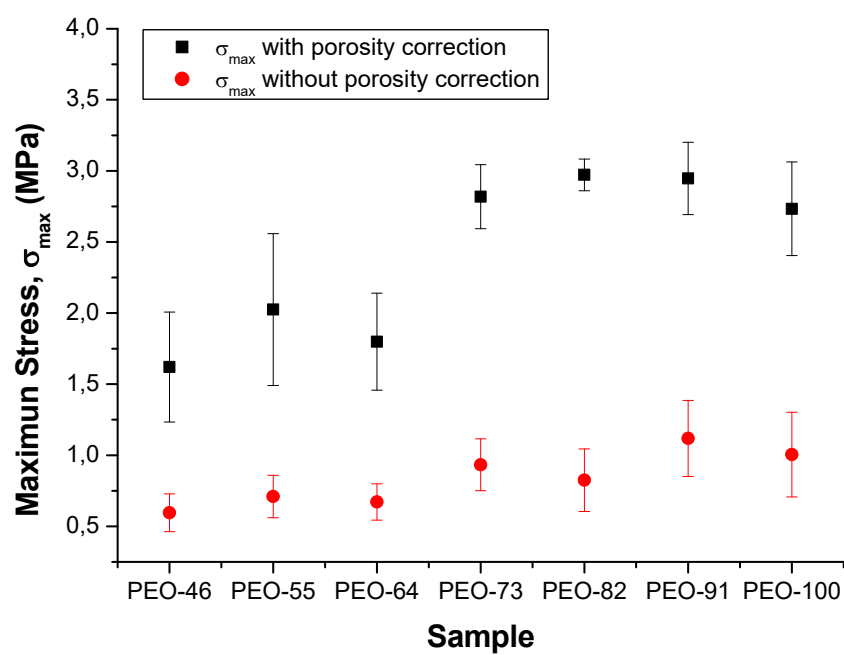

Figure S9. Maximum stress as a function of PEO based material.

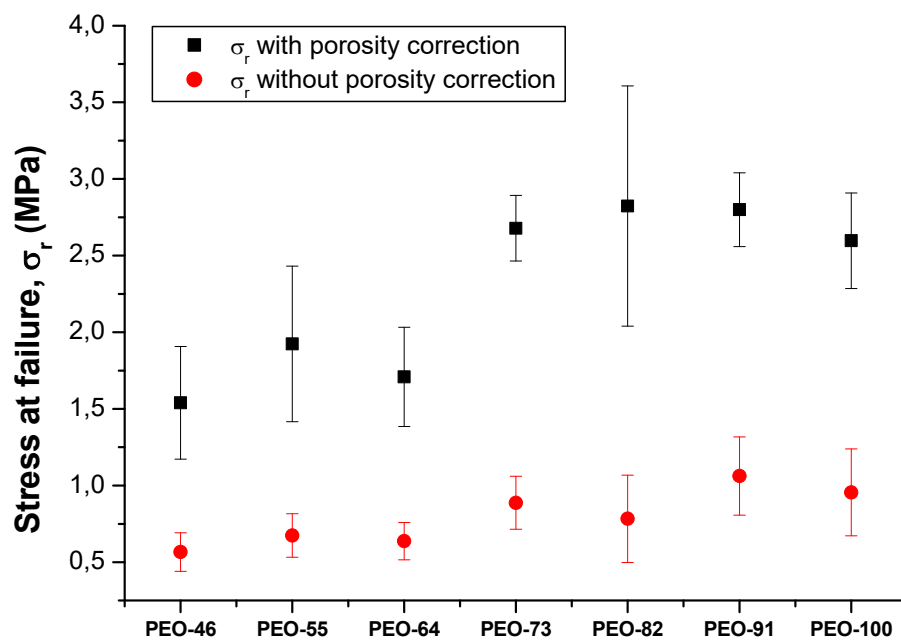

Figure S10. Stress at failure as a function of PEO based material.

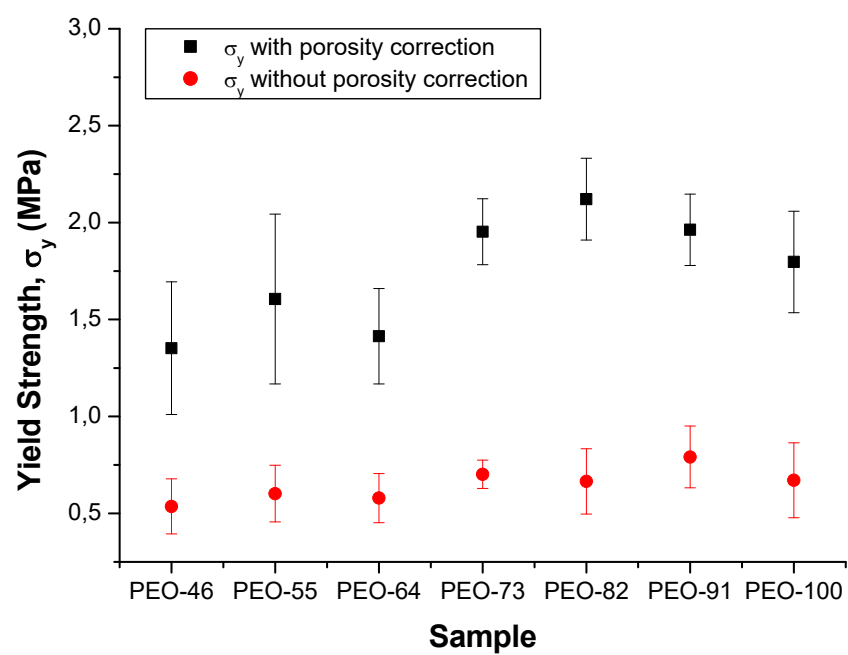

*Figure S11. Yield stress as a function of PEO based material.*
